# Supplementary figures and images for: Inhibition of TLR4 Signaling Affects Mitochondrial Fitness and Overcomes Bortezomib Resistance in Myeloma Plasma Cells
Source: MDPI journal article supplement (doi:10.3390/cancers12081999), 2020-07-22

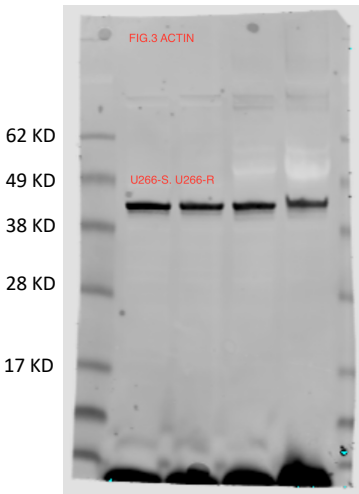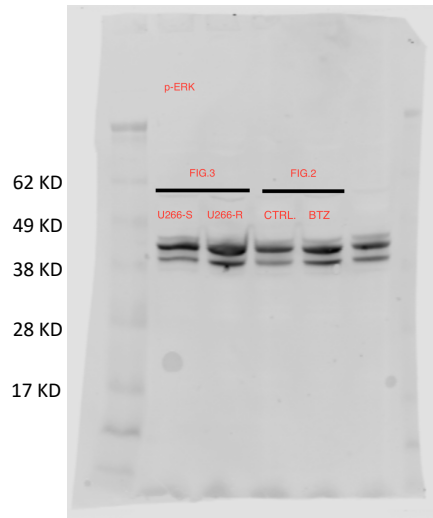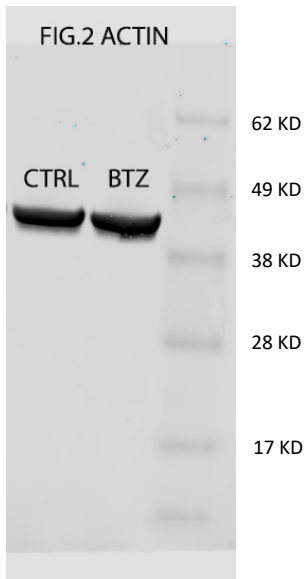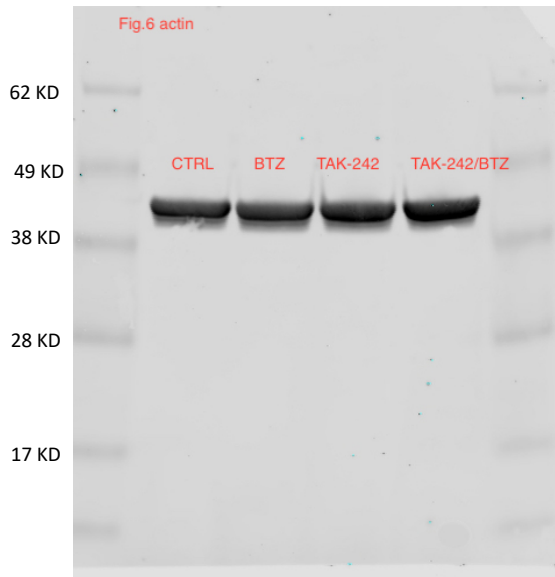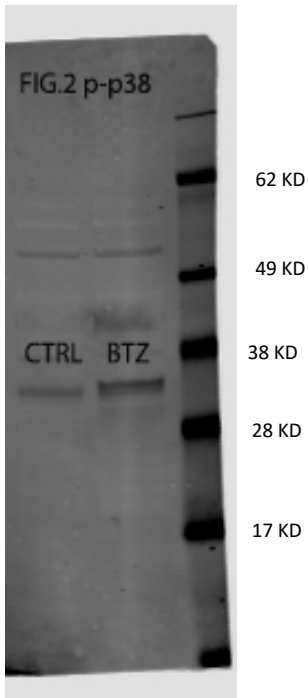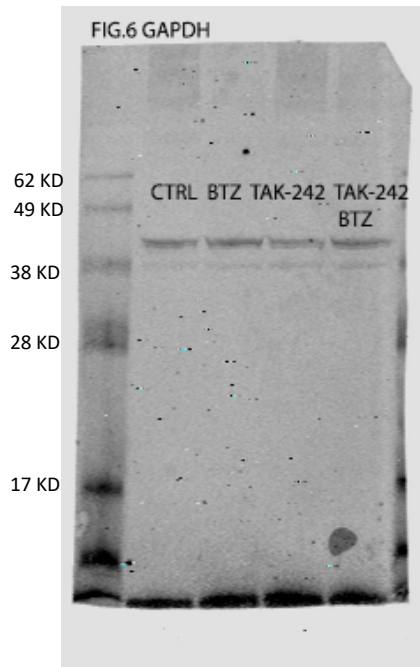

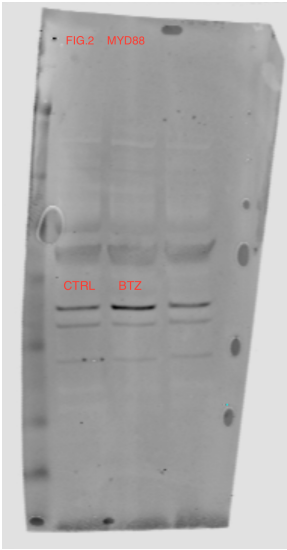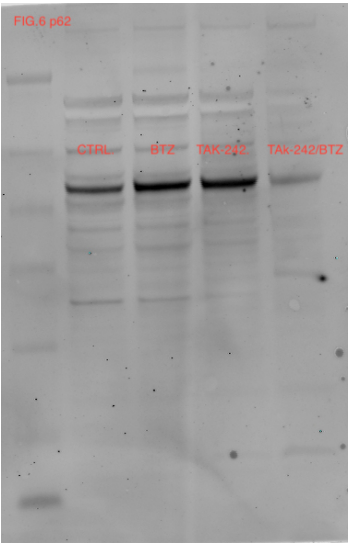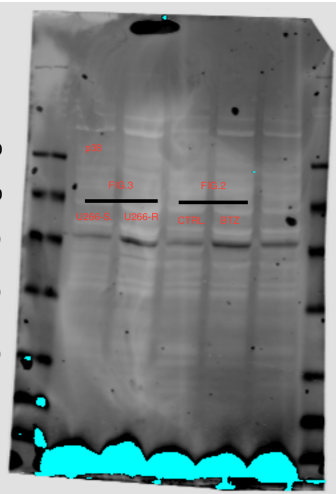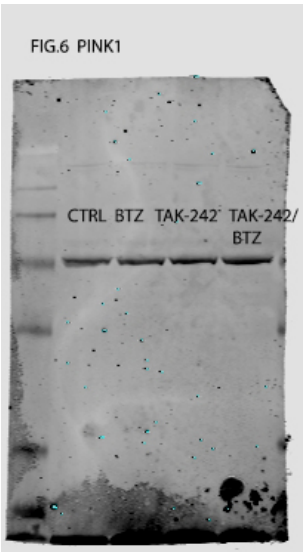

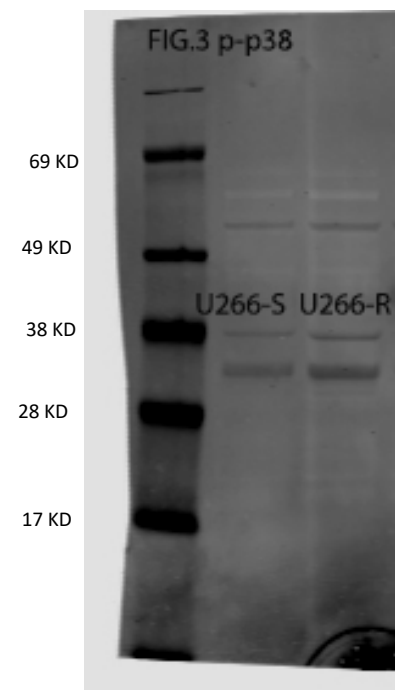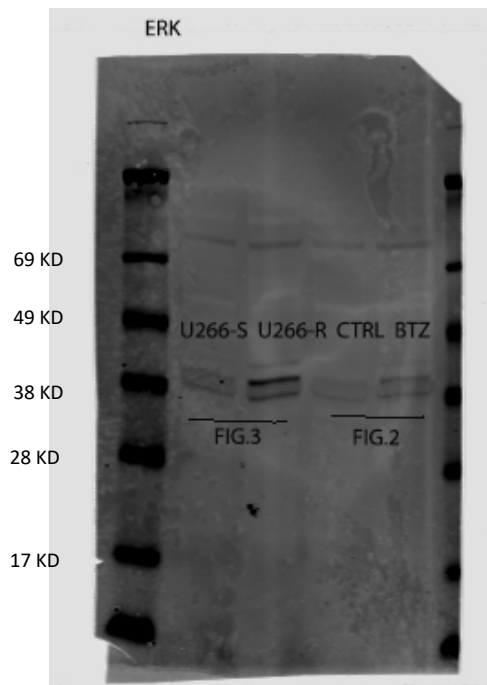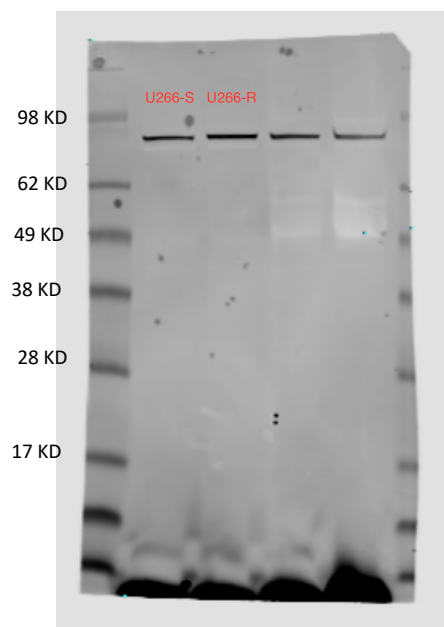

Supplement: s1 [file s1]
